# Supplementary figures and images for: Urine DNA methylation assay enables early detection and recurrence monitoring for bladder cancer
Source: JCI journal article supplement (doi:10.1172/jci139597), 2020-08-20

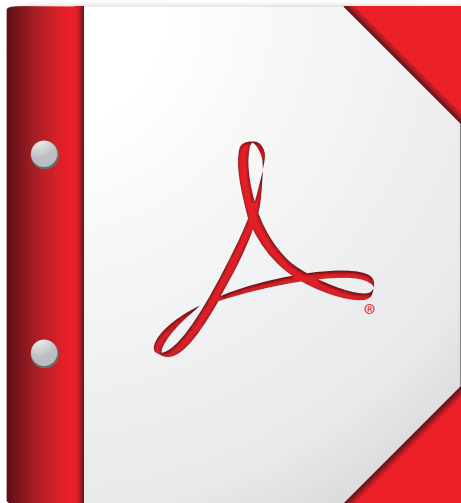

为获得最佳体验，请在 **Acrobat X**、**Adobe Reader X**  
或更高版本中打开此 **PDF** 包。

[立即下载 Adobe Reader!](#)

Supplement: sd3 [file 3]
